# Supplementary material
Source: publisher figshare collection journal article supplement (https://gsapubs.figshare.com/ndownloader/files/37568620)
Supplement: Supplementary file 1 [file 37568620]

## **Supplementary Material for**

### **Calcitic shells in the aragonite sea of the earliest Cambrian**

Luoyang Li<sup>1,2</sup>, Timothy P. Topper<sup>3,4</sup>, Marissa J. Betts<sup>4,5</sup>, Dorj Dorjnamjaa<sup>6</sup>, Gundsambuu Altanshagai<sup>6</sup>, Baktuyag Enkhbaatar<sup>6</sup>, Guoxiang Li<sup>7</sup> and Christian B. Skovsted<sup>3,4</sup>

<sup>1</sup>Frontiers Science Center for Deep Ocean Multispheres and Earth System, Key Lab of Submarine Geosciences and Prospecting Techniques, MOE and College of Marine Geosciences, Ocean University of China, Qingdao 266100, China

<sup>2</sup>Laboratory for Marine Mineral Resources, Pilot National Laboratory for Marine Science and Technology (Qingdao), Qingdao 266237, China

<sup>3</sup>Department of Palaeobiology, Swedish Museum of Natural History, Box 50007, SE-104 05 Stockholm, Sweden

<sup>4</sup>Shaanxi Key Laboratory of Early Life and Environments, State Key Laboratory of Continental Dynamics and Department of Geology, Northwest University, Xi'an 710069, China

<sup>5</sup>Palaeoscience Research Centre, School of Environmental and Rural Science, University of New England, Armidale, New South Wales 2351, Australia

<sup>6</sup>Institute of Paleontology, Mongolian Academy of Sciences, Ulaanbaatar 15160, Mongolia

<sup>7</sup>State Key Laboratory of Palaeobiology and Stratigraphy, Nanjing Institute of Geology and Palaeontology, Chinese Academy of Sciences, Nanjing 210008, China

### **GEOLOGICAL SETTINGS**

The Zavkhan Basin in southwestern Mongolia preserves complete Cryogenian to early Cambrian marine deposits (MacDonald et al., 2009; Bold et al., 2016). Sedimentary sequence consists of the carbonate dominated Tsagaan-Olom Group and overlying Zuun Arts Formation, followed by the mixed carbonate-siliciclastic Bayangol Formation and massive limestones of the Salanygol Formation (Smith et al., 2016). The Ediacaran-Cambrian boundary occurs at the top of the Zuun Arts Formation recognized by a large negative carbon isotopic excursion interpreted as the Basal Cambrian carbon isotope Excursion (BACE) by Smith et al., (2016). This region has been the focus by a number of scientific studies since the 1960s (Bezzubtsev, 1963; Voronin et al., 1982; Brasier et al., 1996), and particularly received great interests in recent palaeontological and geological studies (Pruss et al., 2019; Adachi et al., 2019, 2021; Yang et al., 2020; Steiner et al., 2021). Please refer to Topper et al. (2022) for a comprehensive review with respect to the biostratigraphy, lithostratigraphy and (carbon and oxygen isotope) chemostratigraphy of the region.

The Bayangol Formation in the studied BAY2 section (GPS: N46°42'11.0"/E96°18'44.5", true thickness 359m) is a mix of siliciclastic-carbonate unit of sandstones, mudstones and three distinct limestone intervals. Based on the presence of three massive limestone units, the strata of the Bayangol Formation in the BAY2 section could be correlated to the lower parts, the named BG2 and BG3 members of the formation in Smith et al., (2016). Its boundary to the underlining Zuun Arts Formation in the BAY2 section, however, is not exposed, and strata of middle/upper part of the formation is heavily disturbed by complex thrust faults.

Previous palaeontological studies have yielded a diverse assemblage of small shelly fossils, and two shelly biozones: *Anabarites trisulcatus* Zone and *Purella* Zone were recognized, indicating a Fortunian age of the formation (Brasier et al., 1996). However, the

boundary between the two shelly biozones is poorly constrained. In the BAY2 section, the first appearance of scaly maikhanellid *Purella antique* for defining the base of the *Purella* Zone is at 335m above the base of the section. Abundant and diverse coiled, conical and cyrtconic helcionelloids mollusk shells occur within the *Purella* Zone, especially at the 340/341/342m limestone beds. In the lower parts of the formation belonging to the *Anabarites trisulcatus* Zone, no convincing helcionelloid shell were discovered, but some different scaly maikhanellid shells dose occur, which is also the same case in many other areas such as Siberia and South China (Kouchinsky et al., 2012, 2017).

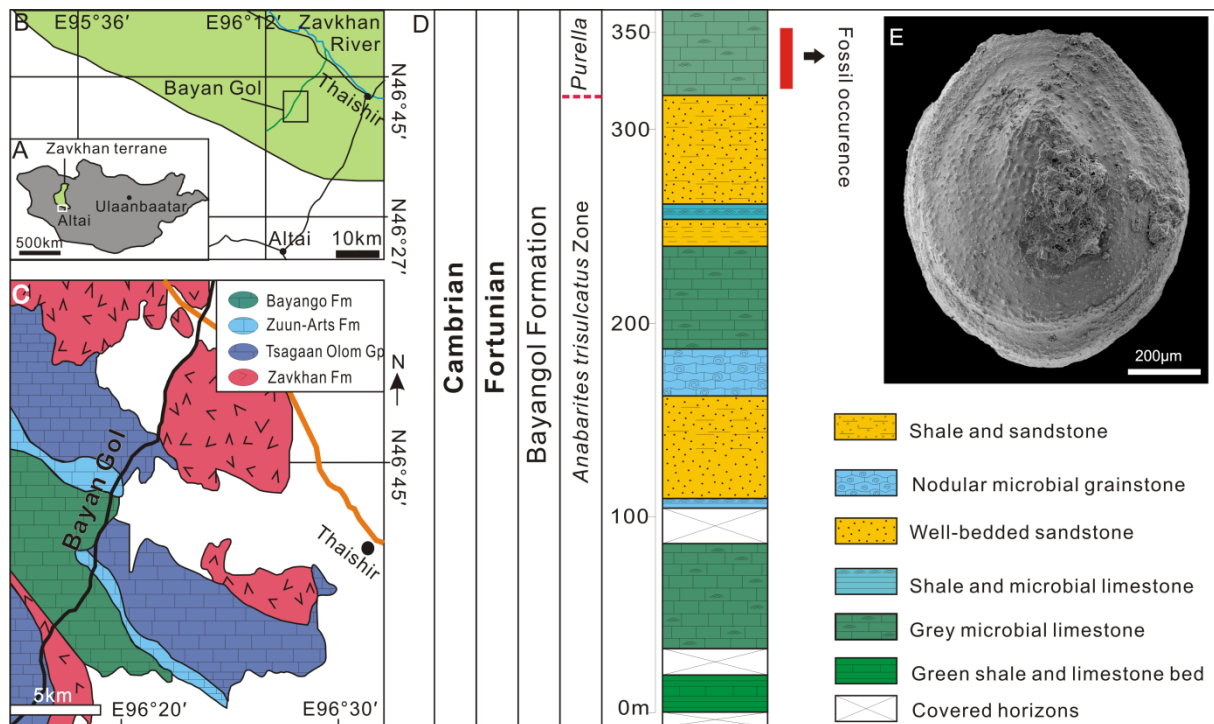

Figure 1. Geological setting, lithostratigraphy and biostratigraphy. (A) Locality map of the Zavkhan terrane, southwestern Mongolia. (B) Location of Bayan Gol in the Zavkhan Basin. (C) Geological map of Bayan Gol and the location of section BAY2, GPS: N46°42'11.0"/E96°18'44.5". (D) Lithostratigraphic columns of the Bayangol Formation in the BAY2 section and fossil occurrence horizon. The boundary of the small shelly fossil *Anabarites trisulcatus*

Zone and *Purella* Zone is temporarily placed at the 335m above the base of the section. (E)  
NRM.XXX. Overall morphology of cap-shaped helcionelloid *Postacanthella voronini*  
Zhegallo in Esakova and Zhegallo, 1996.

## METHODS

Our Mongolian mollusk materials presented in this paper were collected from the 341m limestone bed of the formation. Rock samples were macerated in diluted 5% acetic acid. Acid-resistant residues were washed, sieved carefully, and air-dried at room temperature. Mollusks together with other skeletal fossils were manually picked under stereomicroscopy. Fragments of modern bivalve *Pinctada* shells were chemically etched using 0.5% hydrochloric acid (HCL) for 1-5 minutes, rinsed with tap water for 1 minute, air-dried at room temperature. Then specimens of both fossils and modern shells were mounted, sputter-coated with gold and examined with a FEI Quanta FEG 650 SEM at an accelerating voltage of 15 KV at the Swedish Museum of Natural History. All imaged fossil material is stored at the Swedish Museum of Natural History (NRM).

## REFERENCES CITED

- Adachi, N., Ezaki, Y., Liu, J., Watabe, M., Sonoda, H., Altanshagai, G., Enkhbaatar, B., and Dorjnamjaa, D., 2019, Late Ediacaran *Boxonia*-bearing stromatolites from the Gobi-Altay, western Mongolia: Precambrian Research, v. 334, p. 105470, <https://doi.org/10.1016/j.precamres.2019.105470>.
- Adachi, N., Ezaki, Y., Liu, J., Watabe, M., Altanshagai, G., Enkhbaatar, B., and Dorjnamjaa, D., 2021, Earliest known Cambrian calcimicrobial reefs occur in the Gobi-Altai, western Mongolia: Intriguing geobiological products immediately after the Ediacaran–Cambrian

boundary: *Global and Planetary Change*, v. 203, p. 103530,

<https://doi.org/10.1016/j.gloplacha.2021.103530>.

Bezzubetsev, V.V., 1963, On the Precambrian-Cambrian stratigraphy of the Dzabkhan River Basin. *Materials on the Geology of MPR: Gostopotekhizdat*, 29–42, (in Russian).

Bold, U., Smith, E.F., Rooney, A.D., Bowring, S.A., Buchwaldt, R., Dudás, F.Ó., Ramezani, J., Crowley, J.L., Schrag, D.P. and Macdonald, F.A., 2016, Neoproterozoic stratigraphy of the Zavkhan terrane of Mongolia: The backbone for Cryogenian and early Ediacaran chemostratigraphic records: *American Journal of Science*, v. 316, p. 1–63,

<https://doi.org/10.2475/01.2016.01>.

Brasier, M., Shields, G., Kuleshov, V.N. and Zhegallo, E.A., 1996, Integrated chemo-and biostratigraphic calibration of early animal evolution: Neoproterozoic-early Cambrian of southwest Mongolia: *Geological Magazine*, v. 133, p. 445–485,

<https://doi.org/10.1017/S0016756800007603>.

Esakova, N.V., and Zhegallo, E.A., 1996, *Biostratigrafiya i Fauna Nizhnego Kembriya Mongolii*: Moscow, Sovmestnaya Rossiysko-Mongol'skaya Paleontologicheskaya Ekspeditsiya Trudy, 46 214 p. [in Russian]

Kouchinsky, A., Bengtson, S., Runnegar, B., Skovsted, C., Steiner, M., and Vendrasco, M., 2012, Chronology of early Cambrian biomineralization: *Geological Magazine*, v. 149, p. 221–251, <https://doi.org/10.1017/S0016756811000720>.

Kouchinsky, A., Bengtson, S., Landing, E., Steiner, M., Vendrasco, M., and Ziegler, K., 2017, Terreneuvian stratigraphy and faunas from the Anabar Uplift, Siberia: *Acta Palaeontologica Polonica*, v. 62, p. 311–440, <https://doi.org/10.4202/app.00289.2016>.

- Macdonald, F.A., Jones, D.S., and Schrag, D.P., 2009, Stratigraphic and tectonic implications of a newly discovered glacial diamictite–cap carbonate couplet in southwestern Mongolia: *Geology*, v. 37, p. 123–126, <https://doi.org/10.1130/G24797A.1>.
- Pruss, S.B., Dwyer, C.H., Smith, E.F., Macdonald, F.A., and Tosca, N.J., 2019, Phosphatized early Cambrian archaeocyaths and small shelly fossils (SSFs) of southwestern Mongolia: *Palaeogeography, Palaeoclimatology, Palaeoecology*, v. 513, p. 166–177, <https://doi.org/10.1016/j.palaeo.2017.07.002>
- Smith, E.F., Macdonald, F.A., Petach, T.A., Bold, U., and Schrag, D.P., 2016, Integrated stratigraphic, geochemical, and paleontological late Ediacaran to early Cambrian records from southwestern Mongolia: *GSA Bulletin*, v. 128, p. 442–468, <https://doi.org/10.1130/B31248.1>.
- Steiner, M., Yang, B., Hohl, S., Li, D., and Donoghue, P., 2021, Exceptionally preserved early Cambrian bilaterian developmental stages from Mongolia: *Nature communications*, v. 12, 1037, <https://doi.org/10.1038/s41467-021-21264-7>.
- Topper, T., Betts, M.J., Dorjnamjaa, D., Li, G., Li, L., Altanshagai, G., Enkhbaatar, B. and Skovsted, C.B., 2022, Locating the BACE of the Cambrian: Bayan Gol in southwestern Mongolia and global correlation of the Ediacaran–Cambrian boundary: *Earth-Science Reviews*, v. 229, p. 104017, <https://doi.org/10.1016/j.earscirev.2022.104017>.
- Voronin, Yu.I., Voronova, L.G., Grigor'eva, N.V., Drozdova, N.A., Zhegallo, E.A., Zhuravlev, A.Yu., Ragozina, A.L., Rozanov, A.Yu., Sayutina, T.A., Sysoyev, V.A., and Fonin, V.D., 1982, Granitsa okembriya i kembriya v geosinklinal'nykh oblastiakh (opornyy razrez Salany-Gol, MHR): ovnestnaya SovetskoMongol'skaya Paleontologicheskaya Ekspeditsiya: *Trudy*, 18, p. 1–180, (in Russian).

Yang, B., Steiner, M., Schiffbauer, J.D., Selly, T., Wu, X., Zhang, C., and Liu, P., 2020,  
Ultrastructure of Ediacaran cloudinids suggests diverse taphonomic histories and  
affinities with non-biomineralized annelids: Scientific Reports, v. 10, p. 535,  
<https://doi.org/10.1038/s41598-019-56317-x>.
